# Supplementary material
Source: PubMed Central journal article supplement (PMC1635110)
Supplement: pnas_0607581103_1.pdf [file pnas_0607581103_1.pdf]

# Second base

|                                               |   | t | c | a | g |   |                                               |
|-----------------------------------------------|---|---|---|---|---|---|-----------------------------------------------|
| F<br>i<br>r<br>s<br>t<br><br>b<br>a<br>s<br>e | t | F | S | Y | C | t | T<br>h<br>i<br>r<br>d<br><br>b<br>a<br>s<br>e |
|                                               |   |   |   | - | - | W |                                               |
|                                               | c | L | P | H | R | g |                                               |
|                                               |   |   |   | Q |   | t |                                               |
|                                               | a | I | T | N | S | c |                                               |
|                                               |   | M |   | K | R | a |                                               |
|                                               | g | V | A | D | G | g |                                               |
|                                               |   |   |   | E |   | t |                                               |
|                                               |   |   |   |   |   | c |                                               |
|                                               |   |   |   |   |   | a |                                               |
|                                               |   |   |   |   |   | g |                                               |

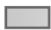

Hydrophobic  
/ buried

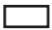

Intermediate  
/ neutral

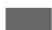

Hydrophilic  
/ surface
