# Supplementary material
Source: PubMed Central journal article supplement (PMC1635110)

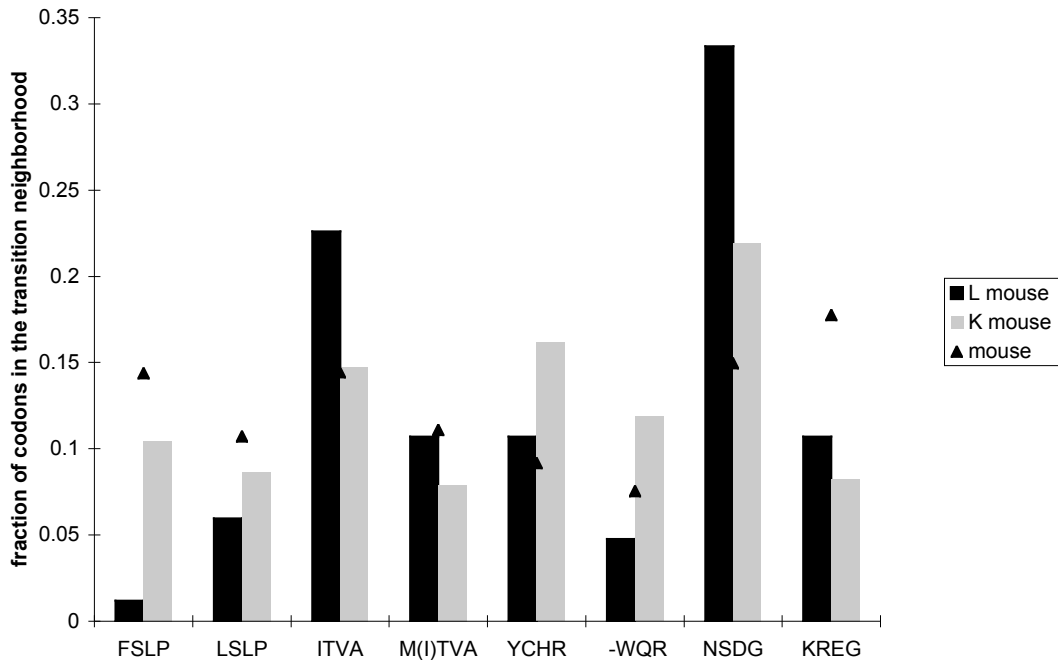

Supplement: pnas_0607581103_2.pdf [file pnas_0607581103_2.pdf]
